# Supplementary figures and images for: Mitochondrial Epigenetic Changes Link to Increased Diabetes Risk and Early‐Stage Prediabetes Indicator
Source: Hindawi journal article supplement (doi:10.1155/2016/5290638), 2016-01-01

**Figure 2s**

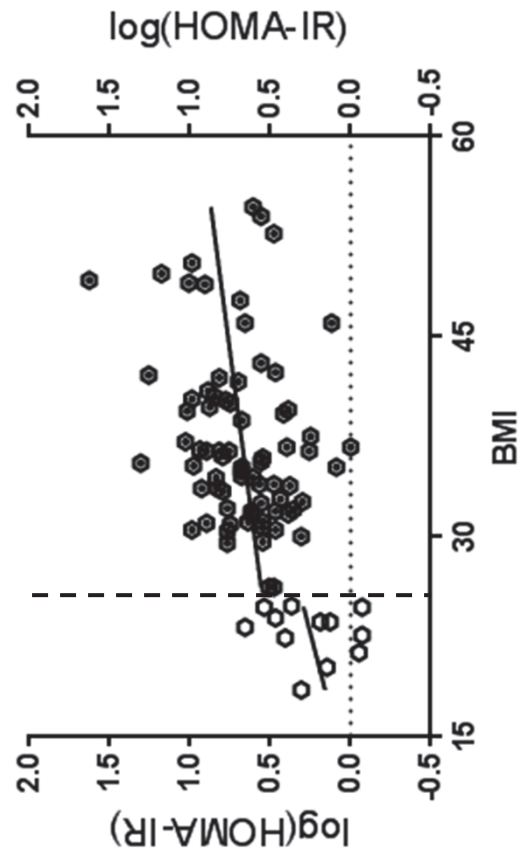

Supplement: f1 [file 5290638.f1.7z]

**Figure 3s**

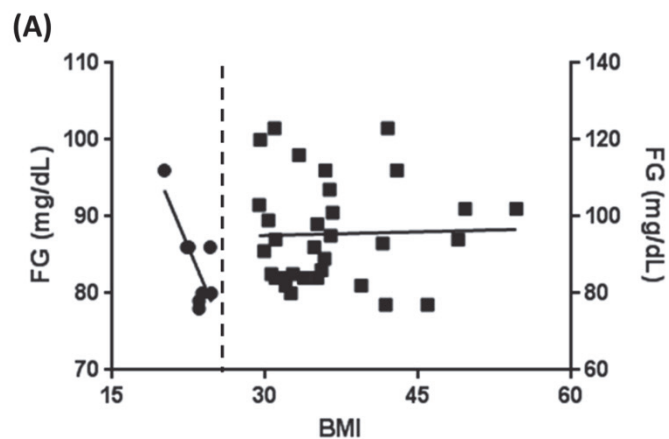

| BMI     | 20.1-24.7 | 29.6-54.6 |
|---------|-----------|-----------|
| $\beta$ | -3.162    | 0.0642    |
| R       | 0.1920    | 0.0310    |
| n       | 8         | 32        |
| p       | 0.0191    | 0.8678    |

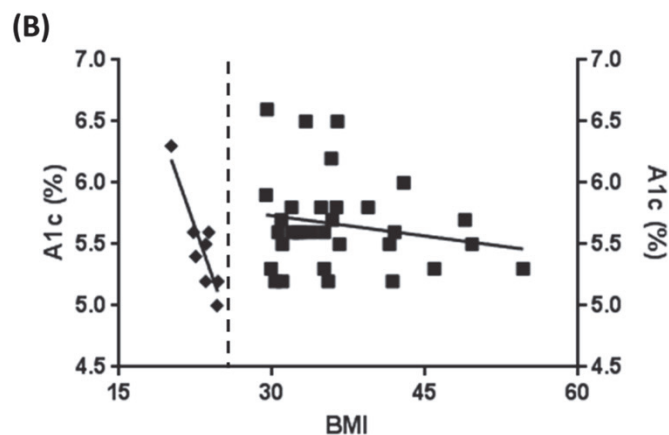

| BMI     | 20.1-24.7 | 29.6-54.6 |
|---------|-----------|-----------|
| $\beta$ | -0.2366   | -0.0111   |
| R       | 0.8936    | 0.1900    |
| n       | 8         | 32        |
| p       | 0.0028    | 0.2977    |

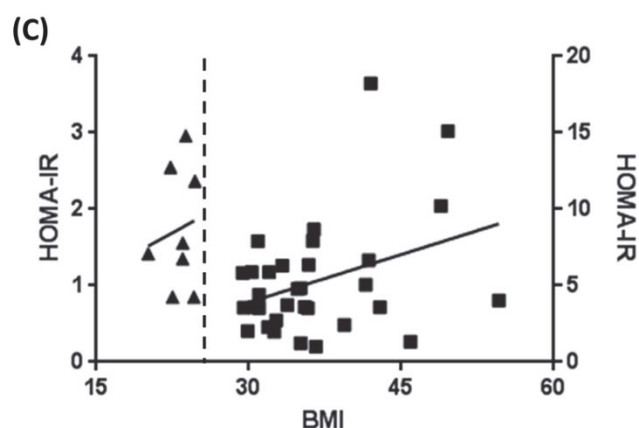

| BMI     | 20.1-24.7 | 29.6-54.6 |
|---------|-----------|-----------|
| $\beta$ | 0.0733    | 0.2087    |
| R       | 0.1380    | 0.3571    |
| n       | 8         | 32        |
| p       | 0.7446    | 0.0448    |

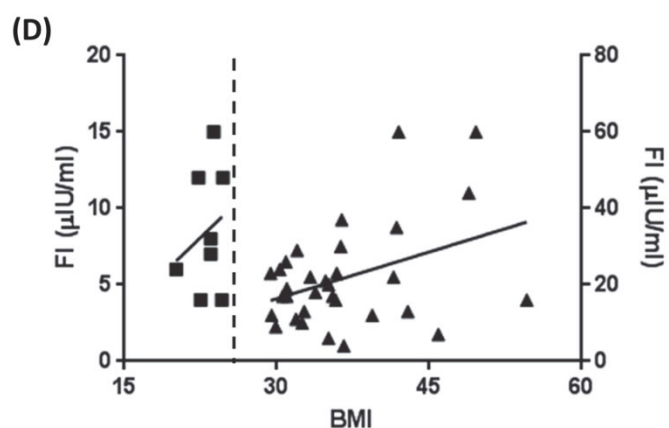

| BMI     | 20.1-24.7 | 29.6-54.6 |
|---------|-----------|-----------|
| $\beta$ | 0.6404    | 0.8140    |
| R       | 0.2349    | 0.3867    |
| n       | 8         | 32        |
| p       | 0.5754    | 0.0288    |

Supplement: f1 [file 5290638.f1.7z]

Figure 5s

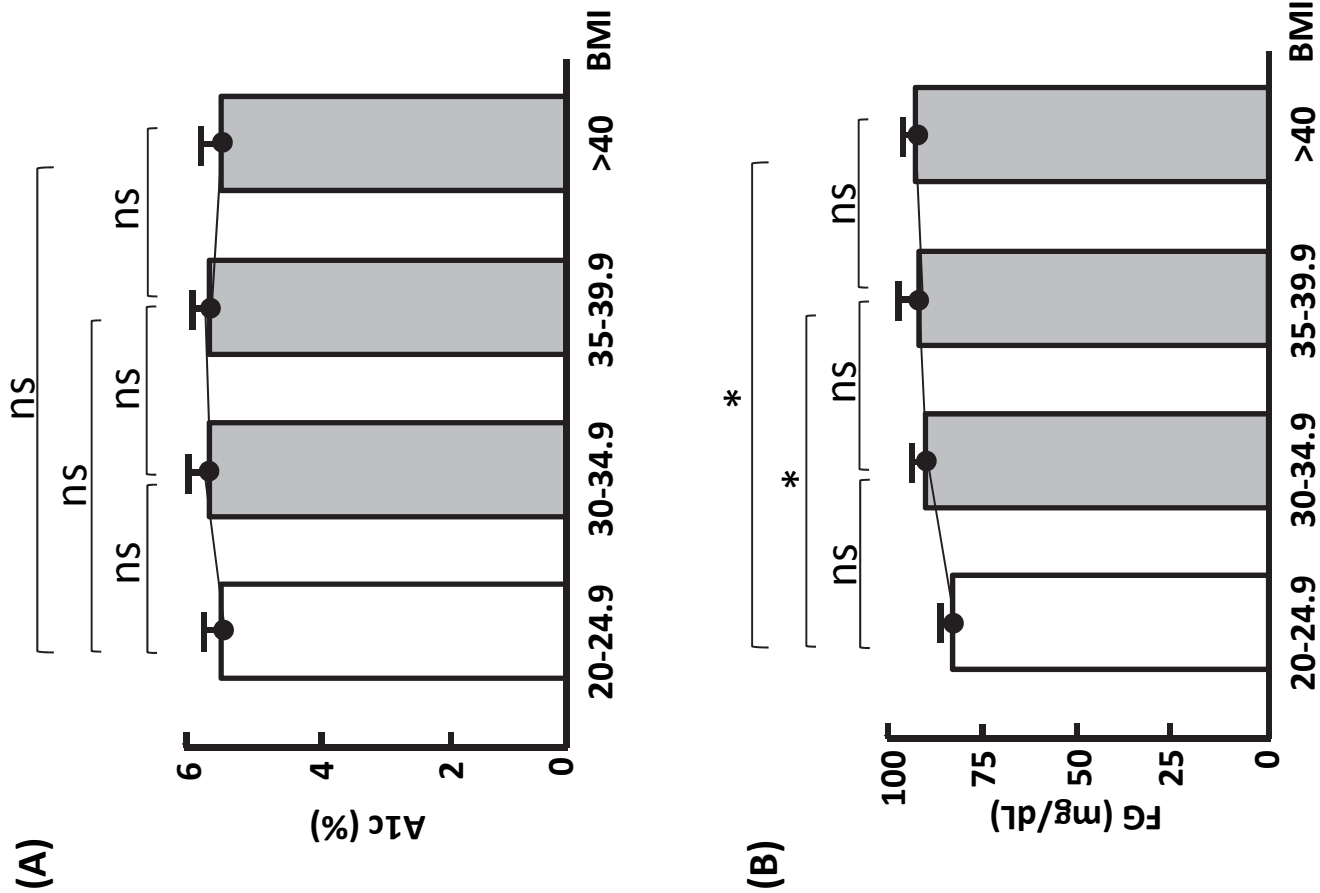

Supplement: f1 [file 5290638.f1.7z]

**Figure 4s**

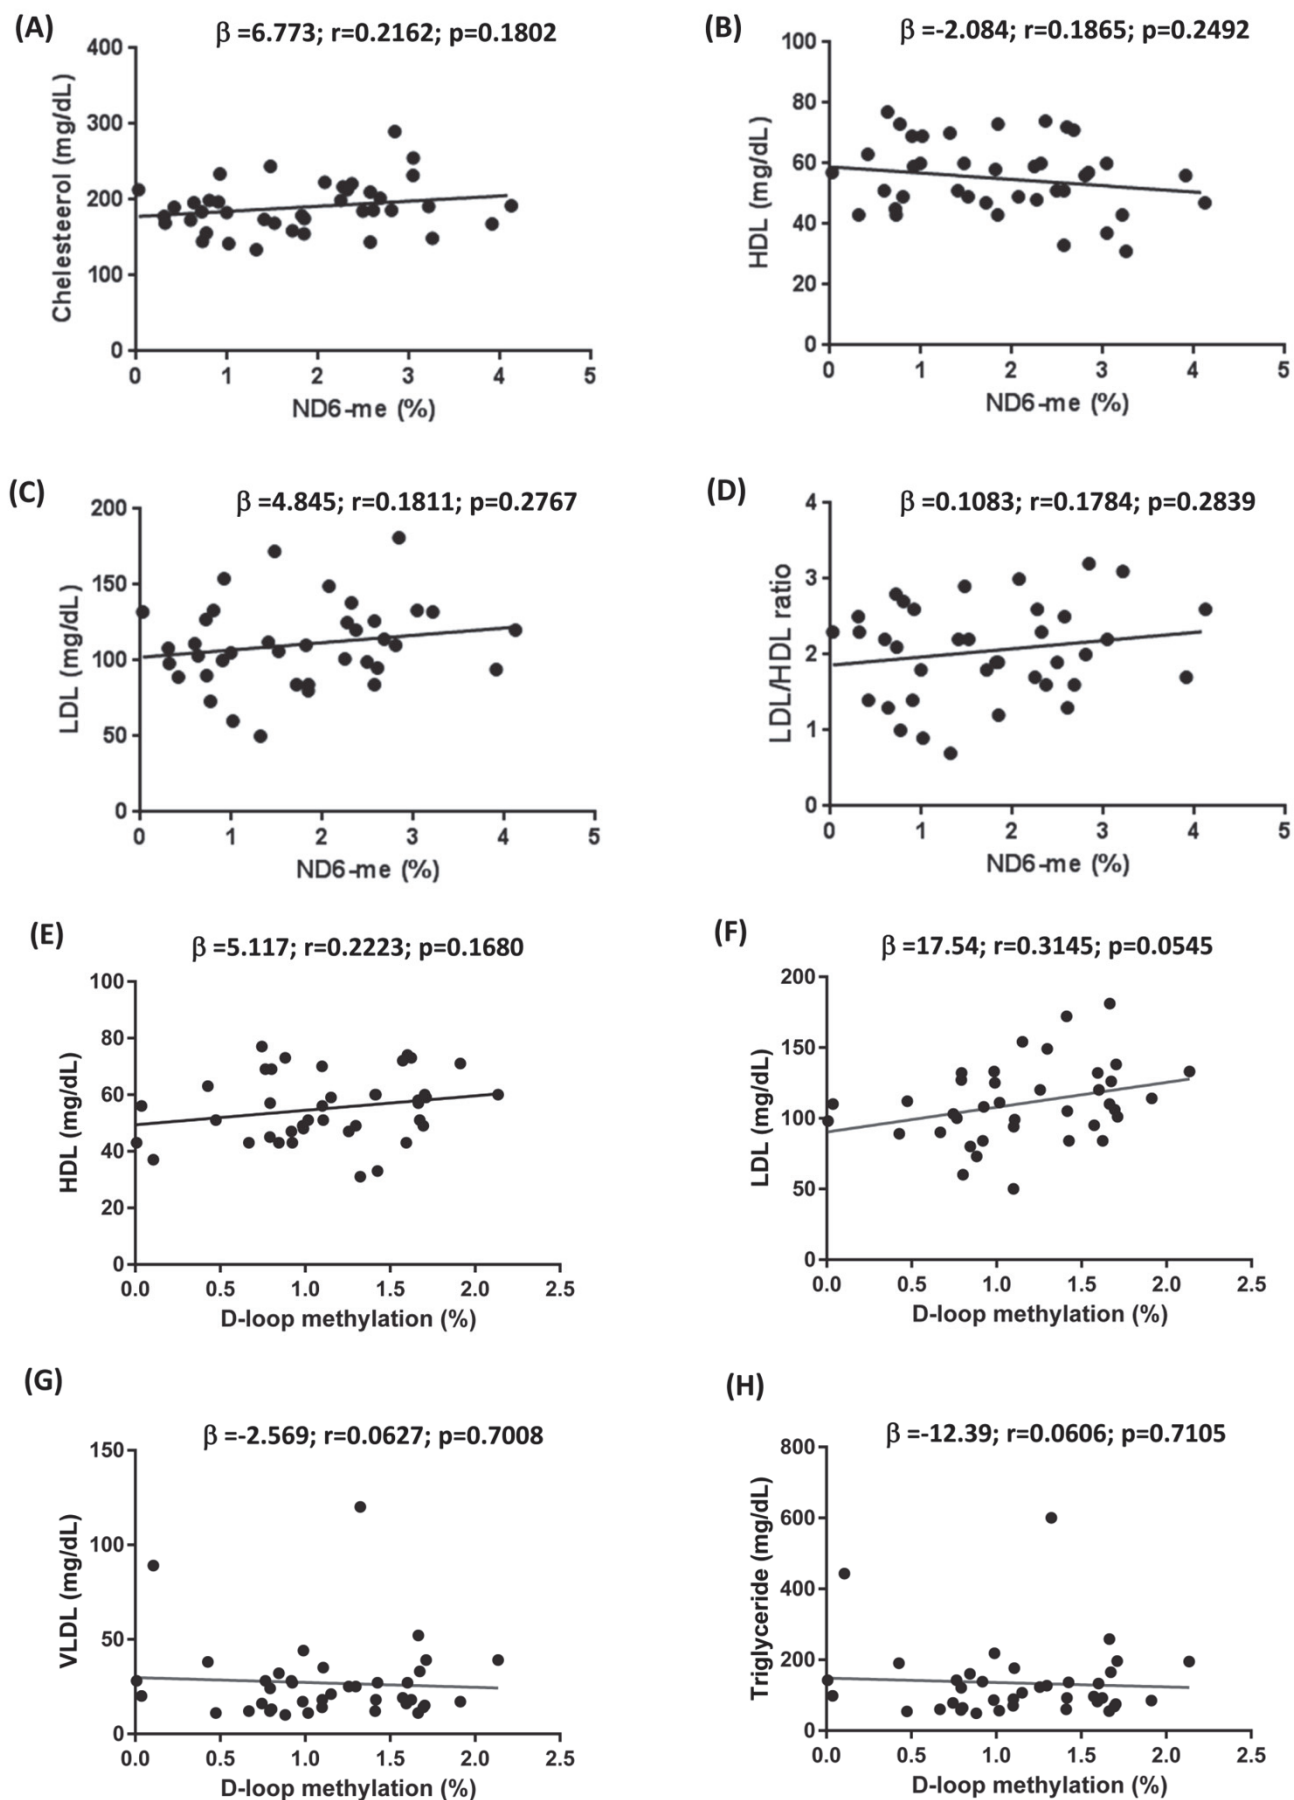

Supplement: f1 [file 5290638.f1.7z]

**Figure 1s**

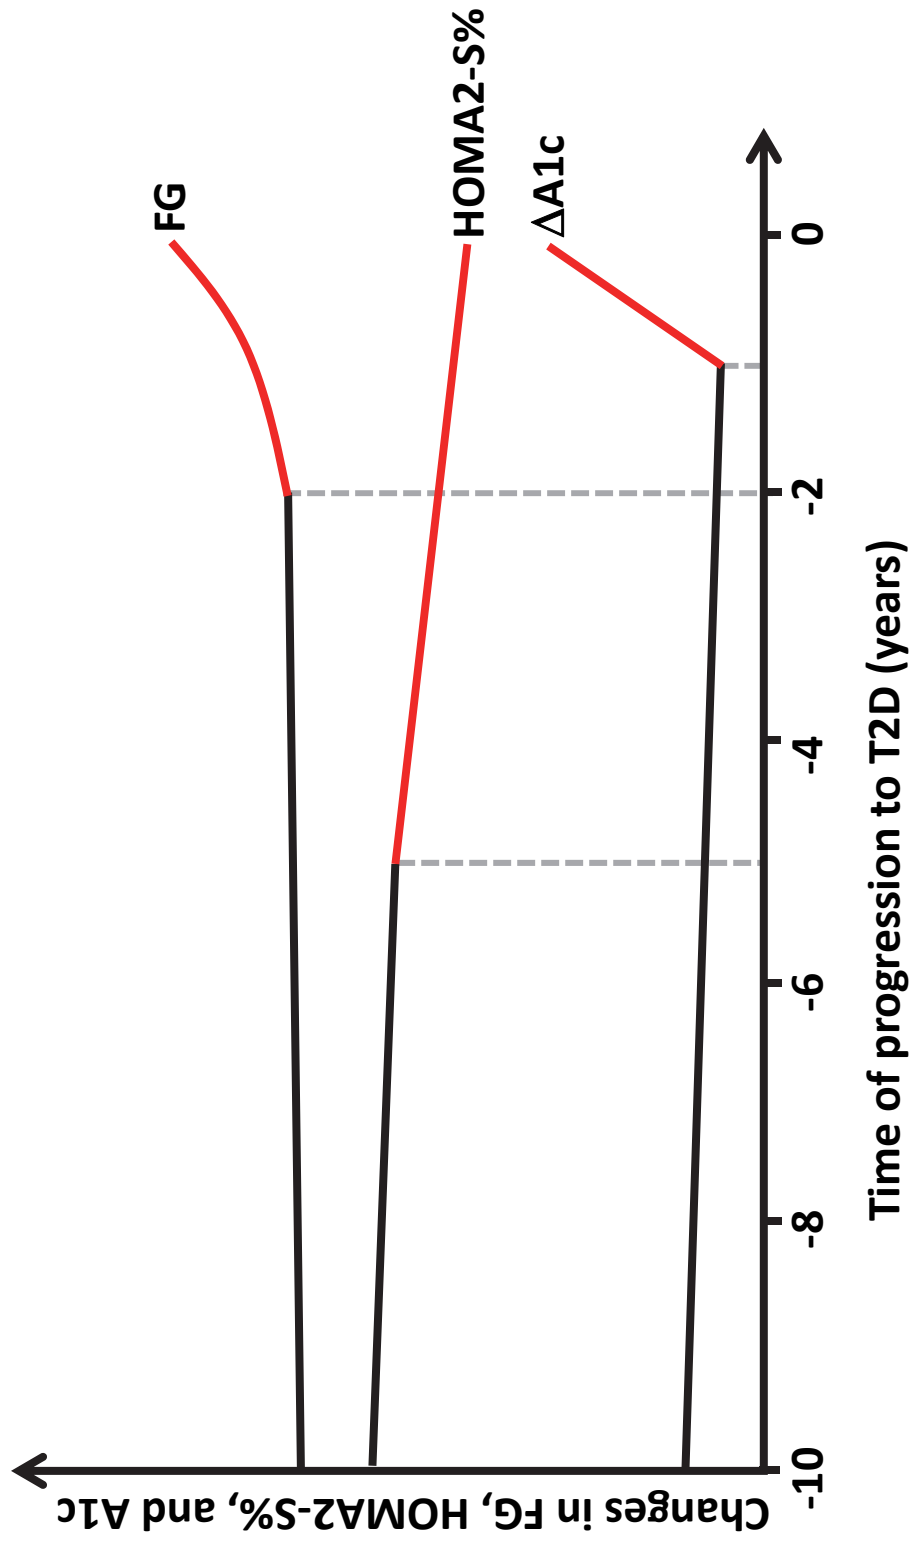

Supplement: f1 [file 5290638.f1.7z]
